# Supplementary material
Source: HighWire-hosted journal article supplement (https://ajnr-sso.highwirestaging.com/highwire/filestream/101735/field_highwire_adjunct_files/0/0836.pdf)
Supplement: 0836.pdf [file 0836.pdf]

# Online Supplemental Data

**Table 1. Baseline, imaging, and clinical outcome characteristics of the MR CLEAN-NO IV CTP with follow-up imaging subgroup compared to the overall MR CLEAN-NO IV trial cohort.** ASPECTS, Alberta Stroke Program Early CT Score; CTA-CS; Computed Tomography Angiography Collateral Score; CTP, Computed Tomography Perfusion; ICA, internal carotid artery; ICA-T, internal carotid artery terminus; IVT, IV alteplase; IQR, interquartile range; mAOL, modified arterial occlusive lesion; mRS, modified Rankin Score; NIHSS, National Institute of Health Stroke Scale; sICH, symptomatic intracranial hemorrhage. If the [known in] number is not shown, the variable was known for all patients.

| <i>Baseline characteristics</i>                             | <b>CTP with FU imaging population – IVT and EVT subgroup (n=81)</b> | <b>CTP with FU imaging population – EVT alone (n=64)</b> | <b>Overall CTP with FU imaging substudy population (n=145)</b> | <b>Overall MR CLEAN-NO IV population (n=539)</b> |
|-------------------------------------------------------------|---------------------------------------------------------------------|----------------------------------------------------------|----------------------------------------------------------------|--------------------------------------------------|
| <b>Age (yr) – median(IQR)</b>                               | 71(61-78)                                                           | 70(61-78)                                                | 70(61-78)                                                      | 71(62-79)                                        |
| <b>Female – n(%)</b>                                        | 31(38)                                                              | 25(39)                                                   | 56(39)                                                         | 234(43)                                          |
| <b>Baseline NIHSS – median(IQR)</b>                         | 16(9-20)                                                            | 15(11-19)                                                | 16(10-20)                                                      | 16(10-20)                                        |
| <b>IVT administered – n yes(%)</b>                          | 81(100)                                                             | 0(0)                                                     | 81(56)                                                         | 285(53)                                          |
| <b>Onset-to-imaging time (min) – median(IQR) [known in]</b> | 68(60-102)                                                          | 67(48-88)                                                | 67(52-101) [n=91]                                              | 67(53-89) [n=170]                                |
| <b>Onset-to-groin time (min) – median (IQR) [known in]</b>  | 137(106-168)                                                        | 140(111-180)                                             | 138(107-174) [n=140]                                           | 133(105-180) [n=511]                             |
| <b>Onset-to-needle time (min) – median (IQR) [known in]</b> | 99(77-139) [n=73]                                                   | NA                                                       | 99(77-139) [n=73]                                              | 100(75-157) [n=260]                              |
| <i>Imaging characteristics</i>                              |                                                                     |                                                          |                                                                |                                                  |
| <b>Occlusion location on baseline CTA – n(%)</b>            |                                                                     |                                                          |                                                                |                                                  |
| ICA                                                         | 0(0)                                                                | 0(0)                                                     | 0(0)                                                           | 4(1)                                             |
| ICA-T                                                       | 16(20)                                                              | 22(34)                                                   | 38(26)                                                         | 114(21)                                          |
| M1                                                          | 49(61)                                                              | 29(45)                                                   | 78(54)                                                         | 330(61)                                          |
| M2                                                          | 16(20)                                                              | 12(19)                                                   | 28(19)                                                         | 85(16)                                           |
| Other                                                       | 0(0)                                                                | 1(2)                                                     | 1(1)                                                           | 5(1)                                             |
| <b>ASPECTS – median(IQR)</b>                                | 9(8-10)                                                             | 9(8-10)                                                  | 9(8-10)                                                        | 9(8-10)                                          |
| <b>CTA-CS – n(%) [known in]</b>                             | [n=77]                                                              | [n=64]                                                   | [n=141]                                                        | [n=526]                                          |
| 0                                                           | 6(8)                                                                | 4(6)                                                     | 10(7)                                                          | 32(6)                                            |
| 1                                                           | 22(29)                                                              | 11(17)                                                   | 33(23)                                                         | 152(29)                                          |
| 2                                                           | 32(42)                                                              | 33(52)                                                   | 65(45)                                                         | 223(42)                                          |

|                                                                |                  |                  |                  |                     |
|----------------------------------------------------------------|------------------|------------------|------------------|---------------------|
| 3                                                              | 17(22)           | 16(25)           | 33(23)           | 119(23)             |
| <b>Baseline ischemic core volume on CTP (mL) – median(IQR)</b> | 17(4-35)         | 11(6-24)         | 14(4-33)         | 13(5-35) [n=223]    |
| <b>Baseline penumbra volume on CTP (mL) – median(IQR)</b>      | 114(79-157)      | 106(82-142)      | 111(80-150)      | 114(78-149) [n=223] |
| <b>eTICI – n(%) [known in]</b>                                 | [n=73]           | [n=60]           | [n=133]          | [n=480]             |
| 0                                                              | 7(10)            | 2(3)             | 9(7)             | 36(8)               |
| 1                                                              | 2(3)             | 1(2)             | 3(2)             | 6(1)                |
| 2a                                                             | 5(7)             | 4(7)             | 9(7)             | 50(10)              |
| 2b                                                             | 18(25)           | 20(33)           | 38(29)           | 109(23)             |
| 2c                                                             | 9(12)            | 6(10)            | 15(11)           | 59(12)              |
| 3                                                              | 32(44)           | 27(45)           | 59(44)           | 220(46)             |
| <b>mAOL at 24h follow-up imaging – n(%) [known in]</b>         | [n=73]           | [n=59]           | [n=132]          | [n=422]             |
| 0                                                              | 4(6)             | 8(14)            | 12(9)            | 35(8)               |
| 1                                                              | 3(4)             | 1(2)             | 4(3)             | 8(2)                |
| 2                                                              | 4(6)             | 7(12)            | 11(8)            | 36(9)               |
| 3                                                              | 62(85)           | 43(73)           | 105(80)          | 343(81)             |
| <b><i>Procedural and clinical outcome characteristics</i></b>  |                  |                  |                  |                     |
| <b>First line stent retriever – n(%) [known in]</b>            | 57(83)           | 46(78)           | 103(81)          | 371(78) [n=474]     |
| <b>Number of retrieval attempts – median(IQR)</b>              | 2(2-3)           | 2(2-4)           | 2(2-3)           | 2(2-3)              |
| <b>Infarct evolution (mL) – median(IQR)</b>                    | 0.3 (-6.0; 26.2) | 1.8 (-5.7; 22.9) | 1.3 (-5.7; 25.4) | N/A                 |
| <b>Poor functional outcome (mRS 5-6)– n(%)</b>                 | 16(20)           | 13(20)           | 29(20)           | 153(28)             |
| <b>Functional independence (mRS 0-2)– n(%)</b>                 | 45(56)           | 37(58)           | 82(57)           | 270(50)             |
| <b>Mortality at 90 days – n(%)</b>                             | 10(12)           | 9(14)            | 19(13)           | 98(18)              |
| <b>sICH – n(%)</b>                                             | 0(0)             | 0(0)             | 0(0)             | 1(0)                |

## Appendix B

### *Sensitivity analysis of patients with 24h follow-up DWI and CT imaging*

One hundred and four of 145 (72%) patients received 24h follow-up imaging. Of those, 67/145 (46%) patients received a follow-up DWI at median 27 (IQR 23-40) hours. Thirty-seven (26%) patients received follow-up CT imaging at median 24 (IQR 18-25) hours.

Baseline characteristics were comparable to the overall study population. Median CTP ischemic core volume was 12 (IQR 4-29) mL. Median FIV was 11 (IQR 3-41) mL.

Substantial infarct growth occurred in 15/57 (26%) patients who received IVT prior to EVT (median lesion evolution -1 [IQR -9; 14] mL) vs. in 17/47 (36%) patients who underwent EVT alone (median lesion evolution 1 [IQR -6; 20] mL,  $p=0.3$ ). Patients with 24h DWI had similar rates of successful reperfusion (51/67 [76%]) compared to patients with follow-up CT at 24h (28/37 [76%]) and follow-up CT at 1 week (33/41 [80%]). In addition, the infarct evolution was comparable between patients with 24h DWI (median 1 mL) and 24h CT (median -1 mL). Patients with 1-week CT did show significantly different infarct evolution (median infarct growth 13 mL) compared to patients with 24h CT- or DWI imaging ( $p=0.02$ ).

### *Sensitivity analysis of patients with tandem lesions*

Nineteen (13%) patients had a tandem lesion on baseline CTA. Eight (42%) patients with a tandem lesion received IVT prior to EVT. Patients with a tandem lesion had a longer median onset-to-groin time (175 minutes) compared to patients without tandem lesions (135 min) ( $p<0.001$ ). All other baseline characteristics were similar. Infarct growth occurred in 5/8 (63%) tandem lesion patients who received IVT prior to EVT versus 5/11 (46%) patients with EVT alone ( $p=0.5$ ).

# Appendix B

## Online Table I

**Supplemental Table I. Univariable analysis of substantial infarct growth (>10 mL).** ASPECTS, Alberta Stroke Program Early CT Score; CI, Confidence Interval; CTA; Computed Tomography Angiography; IVT, intravenous alteplase; mRS, modified Rankin Scale; N, number of patients included in analysis; OR, Odds Ratio.

| Characteristic                  | N          | OR          | 95% CI            | p-value          | q-value*         |
|---------------------------------|------------|-------------|-------------------|------------------|------------------|
| IVT administration              | 145        | 0.69        | 0.35, 1.35        | 0.27             | 0.31             |
| ASPECTS                         | 145        | 0.84        | 0.68, 1.04        | 0.10             | 0.15             |
| CTA collateral score            | <b>141</b> | <b>0.59</b> | <b>0.39, 0.89</b> | <b>0.011</b>     | <b>0.033</b>     |
| Onset-to-reperfusion time (min) | 145        | 1.00        | 1.00, 1.01        | 0.31             | 0.31             |
| eTICI score                     | 133        | 0.80        | 0.63, 1.02        | 0.067            | 0.12             |
| Reocclusion                     | <b>132</b> | <b>3.70</b> | <b>1.28, 11.6</b> | <b>0.016</b>     | <b>0.036</b>     |
| Occlusion location              | 145        | 1.36        | 0.84, 2.24        | 0.22             | 0.28             |
| Total attempts during EVT       | <b>145</b> | <b>1.49</b> | <b>1.18, 1.92</b> | <b>&lt;0.001</b> | <b>0.002</b>     |
| Any hemorrhage                  | <b>145</b> | <b>6.96</b> | <b>3.21, 15.8</b> | <b>&lt;0.001</b> | <b>&lt;0.001</b> |

\* False discovery rate correction for multiple testing

## Online Table II

**Supplemental Table II. Multivariable analysis of substantial infarct growth (>10 mL).**  
ASPECTS, Alberta Stroke Program Early CT Score; CI, Confidence Interval; CTA; Computed Tomography Angiography; IVT, intravenous alteplase; OR, Odds Ratio.

| Characteristic                  | OR          | 95% CI            | p-value          |
|---------------------------------|-------------|-------------------|------------------|
| IVT administration              | 0.46        | 0.17, 1.21        | 0.12             |
| ASPECTS                         | 0.82        | 0.61, 1.13        | 0.2              |
| CTA collateral score            | <b>0.42</b> | <b>0.22, 0.77</b> | <b>0.006</b>     |
| Onset-to-reperfusion time (min) | 1.00        | 0.99, 1.01        | 0.7              |
| eTICI score                     | 0.85        | 0.58, 1.25        | 0.4              |
| Reocclusion                     | <b>2.49</b> | <b>1.24, 5.32</b> | <b>0.013</b>     |
| Occlusion location              | 1.48        | 0.28, 7.83        | 0.6              |
| Total attempts during EVT       | <b>1.48</b> | <b>1.06, 2.14</b> | <b>0.026</b>     |
| Any hemorrhage                  | <b>6.23</b> | <b>2.30, 18.4</b> | <b>&lt;0.001</b> |
